# Supplementary material
Source: PubMed Central journal article supplement (PMC11028122)
Supplement: 262_2017_2087_MOESM1_ESM.pdf [file 262_2017_2087_MOESM1_ESM.pdf]

## Supplemental Materials

Supplementary figure 1

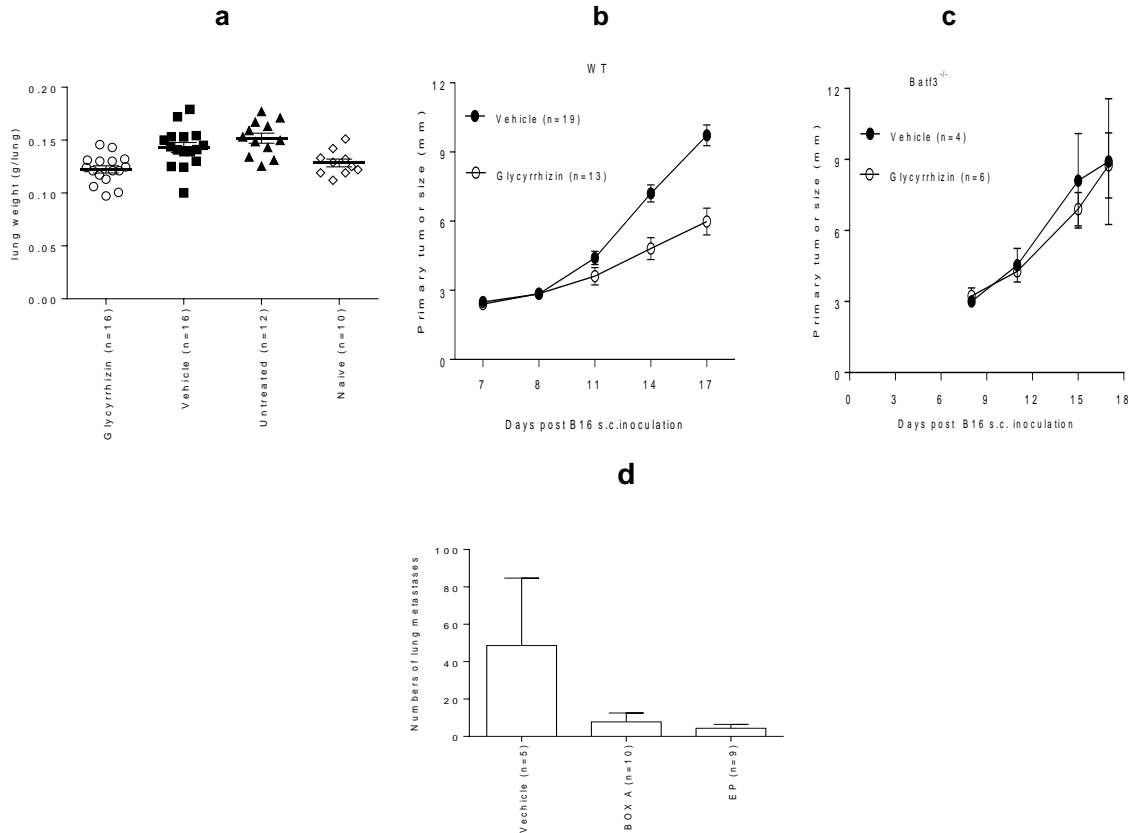

**Supplementary figure 1: a) I.t. inhibiting HMGB1 by GL in 4T1.2-Neu breast tumor reduces spontaneous lung metastases.** BALB/c mice were s.c. inoculated with 4T1.2-Neu. 8 d later, tumor-bearing mice were untreated or treated by GL or vehicle (Figure 5a). D 21 post tumor inoculation, lung metastases were determined by lung weights. Age-matched naïve mice served as controls. Data were statistically analyzed using a student's *t*-test. GL vs. vehicle or untreated:  $p < 0.01$ ; GL vs. naive: NS. **b-c) I.t. inhibiting HMGB1 by GL in B16 melanoma generates CD8 $\alpha^+$ /CD103 $^+$ DC-dependent antitumor immunity.** B6-WT or -Batf3 $^{-/-}$  mice were s.c. inoculated with B16. 8 d later, B16-bearing mice were treated by GL or vehicle and tumor growth was monitored (Figure 5a). Data were statistically analyzed using a student's *t*-test. GL vs. vehicle:  $p < 0.001$ . **d) I.t. inhibiting HMGB1 by EP or Box A in 4T1.2-Neu breast tumor reduces spontaneous lung metastases.** Tumor-bearing BALB/c mice were untreated or treated as listed (Figure 5f). D 25 post tumor inoculation, lung metastases was determined by counting the numbers of tumor loci. Data were statistically analyzed by using a student's *t*-test. Box A or EP vs. vehicle:  $p > 0.05$ .

**Supplementary figure 2**

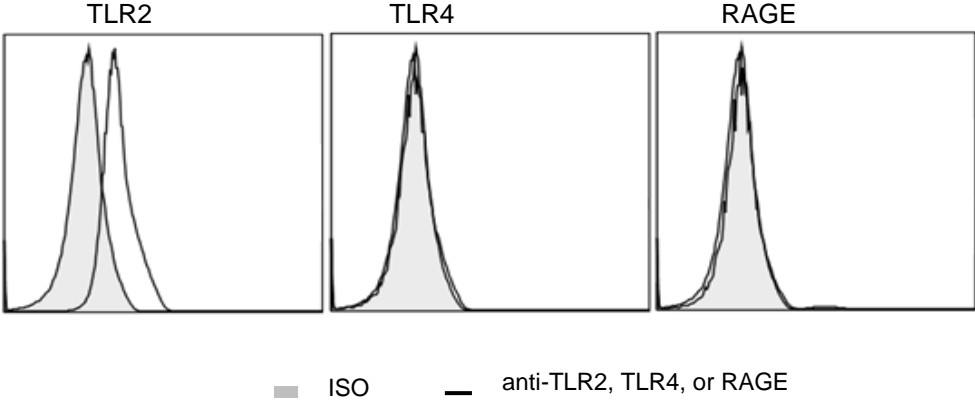

**Supplementary figure 2: Tumor cells express TLR2.** 4T1.2-Neu tumor cells were stained with anti-TLR2, -TLR4 or -RAGE and analyzed by flow cytometry (Figure 3a). Data showing the expression of TLR2, TLR4 or RAGE on tumor cells is representative of three independent experiments with a similar result.

**Supplementary figure 3**

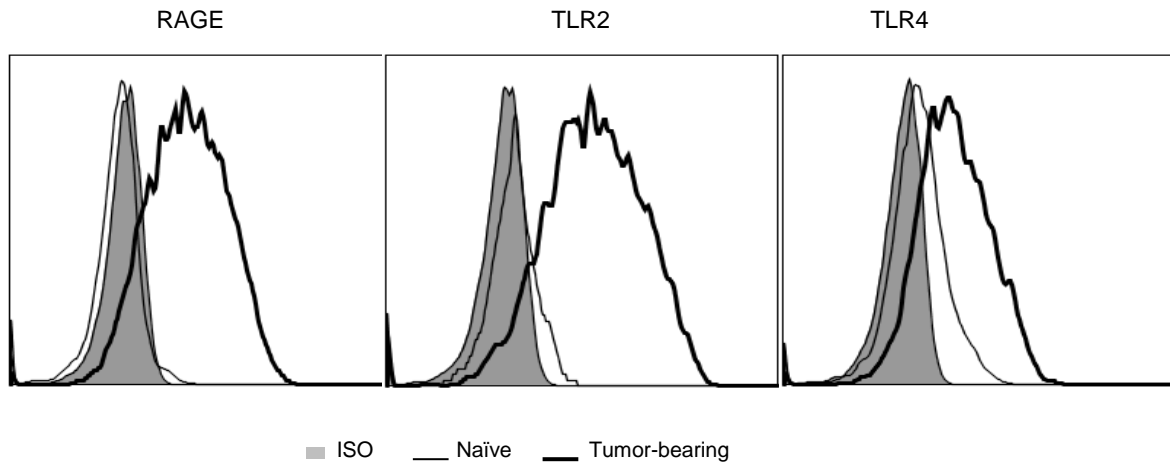

**Supplementary figure 3: Tumor progression induces the expression of HMGB1 receptors on tumor-**

**associated Treg.** BALB/c or Foxp3-eGFP BALB/c mice were s.c. inoculated with 4T1.2-Neu tumor cells. 10 d later, single-cell suspensions of the TDLN (LN from naïve mice as control) were stained by anti-RAGE, -TLR2, or -TLR4 and analyzed by flow cytometry (Figure 3a). RAGE, TLR2 or TLR4 on Treg (eGFP<sup>+</sup>) is shown. Results are representative of three independent experiments with a similar result.

**Supplementary figure 4 a**

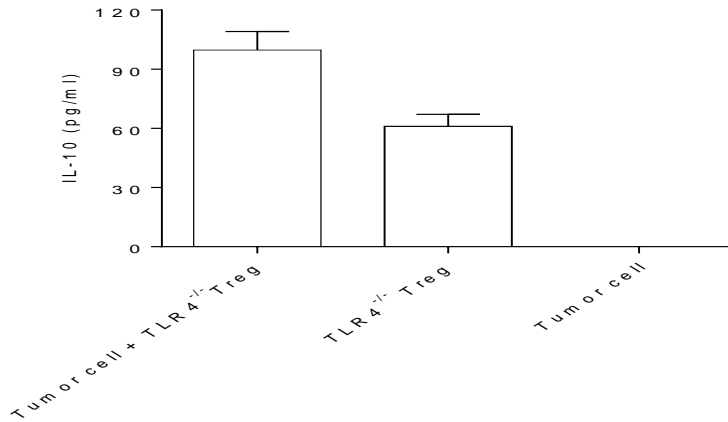

**b**

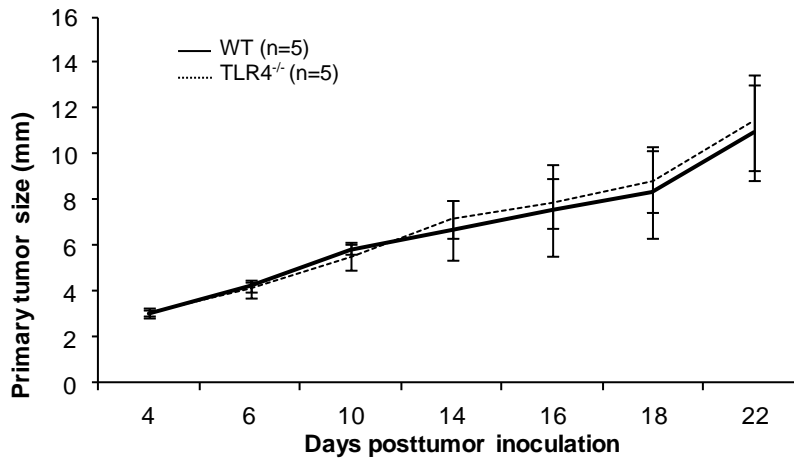

**Supplementary figure 4: a) TLR4 on tumor-associated Treg is not required for tumor cell-enhanced IL-10 production.** TLR4<sup>-/-</sup>-Treg were obtained from 4T1.2-Neu-bearing BALB/c-TLR4<sup>-/-</sup> mice [19]. Tumor TLR4<sup>-/-</sup>-Treg (2x10<sup>5</sup>) were cocultured with or without tumor cells in 200µl RPMI 1640 10%FBS at 37°C, 5% CO<sub>2</sub> for 2 d (19). IL-10 in the supernatants was determined by ELISA. Data represents three independent experiments and were statistically analyzed by using student's *t* test. Tumor cell+TLR4<sup>-/-</sup>Treg vs. TLR4<sup>-/-</sup>Treg: p<0.05. **b) Deficiency of TLR4 does not affect tumor growth.** BALB/c-WT or-TLR4<sup>-/-</sup> mice were s.c. inoculated with 4T1.2-Neu tumor cells and tumor growth was monitored.
